# Supplementary material for: Evaluating Electrolyte–Anode Interface Stability in Sodium All-Solid-State Batteries
Source: PubMed Central journal article supplement (PMC9614718; doi:10.1021/acsami.2c12759), 2022-10-14
Supplement: am2c12759_si_001.pdf [file am2c12759_si_001.pdf]

# Supporting Information

## Evaluating Electrolyte–Anode Interface Stability in Sodium All-Solid-State Batteries

Grayson Deysher<sup>a</sup>, Yu-Ting Chen<sup>a</sup>, Baharak Sayahpour<sup>a</sup>, Sharon Wan-Hsuan Lin<sup>b</sup>, So-Yeon Ham<sup>a</sup>, Phillip Ridley<sup>b</sup>, Ashley Cronk<sup>a</sup>, Erik A. Wu<sup>b</sup>, Darren H. S. Tan<sup>b</sup>, Jean-Marie Doux<sup>b</sup>, Jin An Sam Oh<sup>b</sup>, Jihyun Jang<sup>b</sup>, Long Hoang Bao Nguyen<sup>b</sup>, Ying Shirley Meng<sup>b,c,\*</sup>

<sup>a</sup> Program of Materials Science and Engineering, University of California San Diego, La Jolla, CA 92093, United States.

<sup>b</sup> Department of NanoEngineering, University of California San Diego, La Jolla, CA 92093, United States.

<sup>c</sup> Pritzker School of Molecular Engineering, The University of Chicago, Chicago, IL 60637, United States

\* Corresponding author: [shirleymeng@uchicago.edu](mailto:shirleymeng@uchicago.edu)

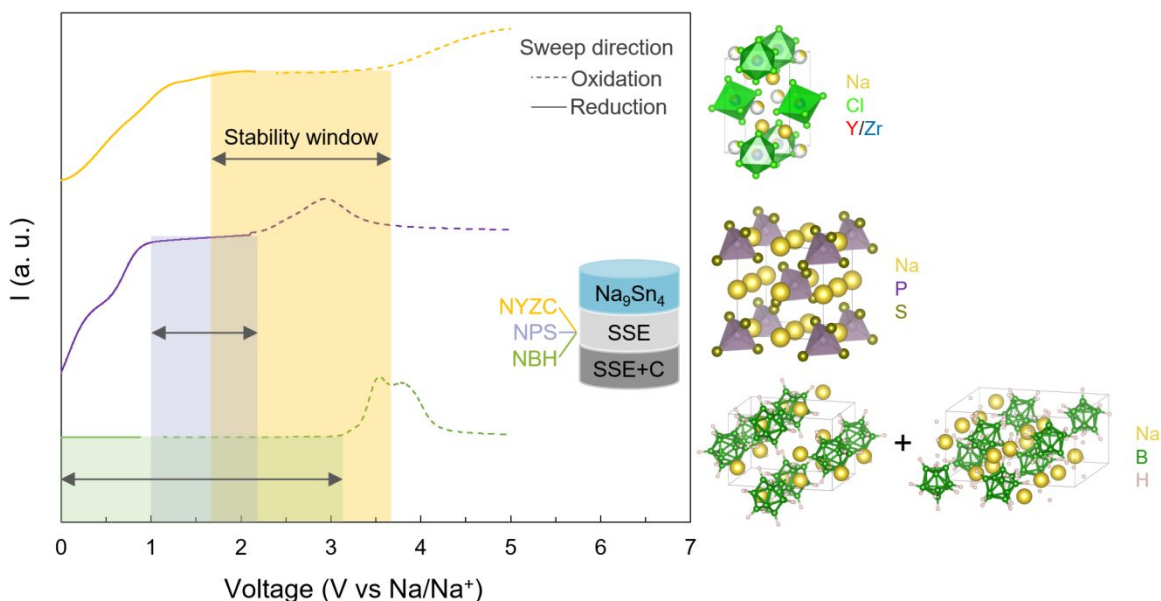

**Figure S1.** Linear sweep voltammograms for NYZC, NPS, and NBH.

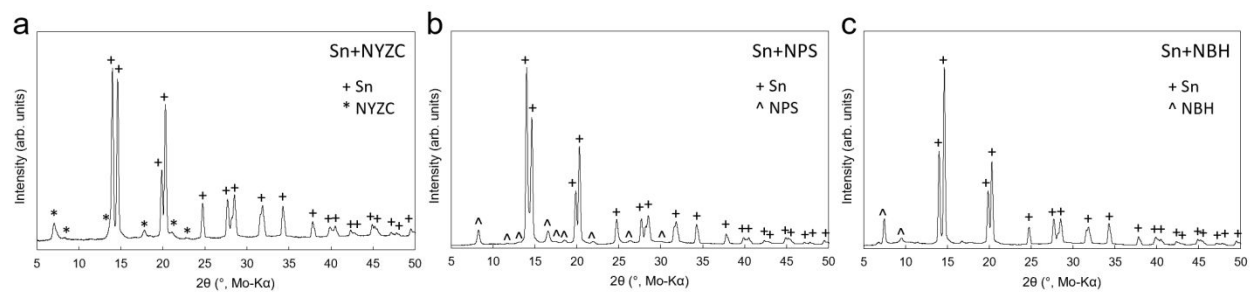

**Figure S2.** XRD patterns for mixtures of Sn with a) NYZC, b) NPS, and c) NBH after heating at 80  $^\circ\text{C}$  for 10 h.

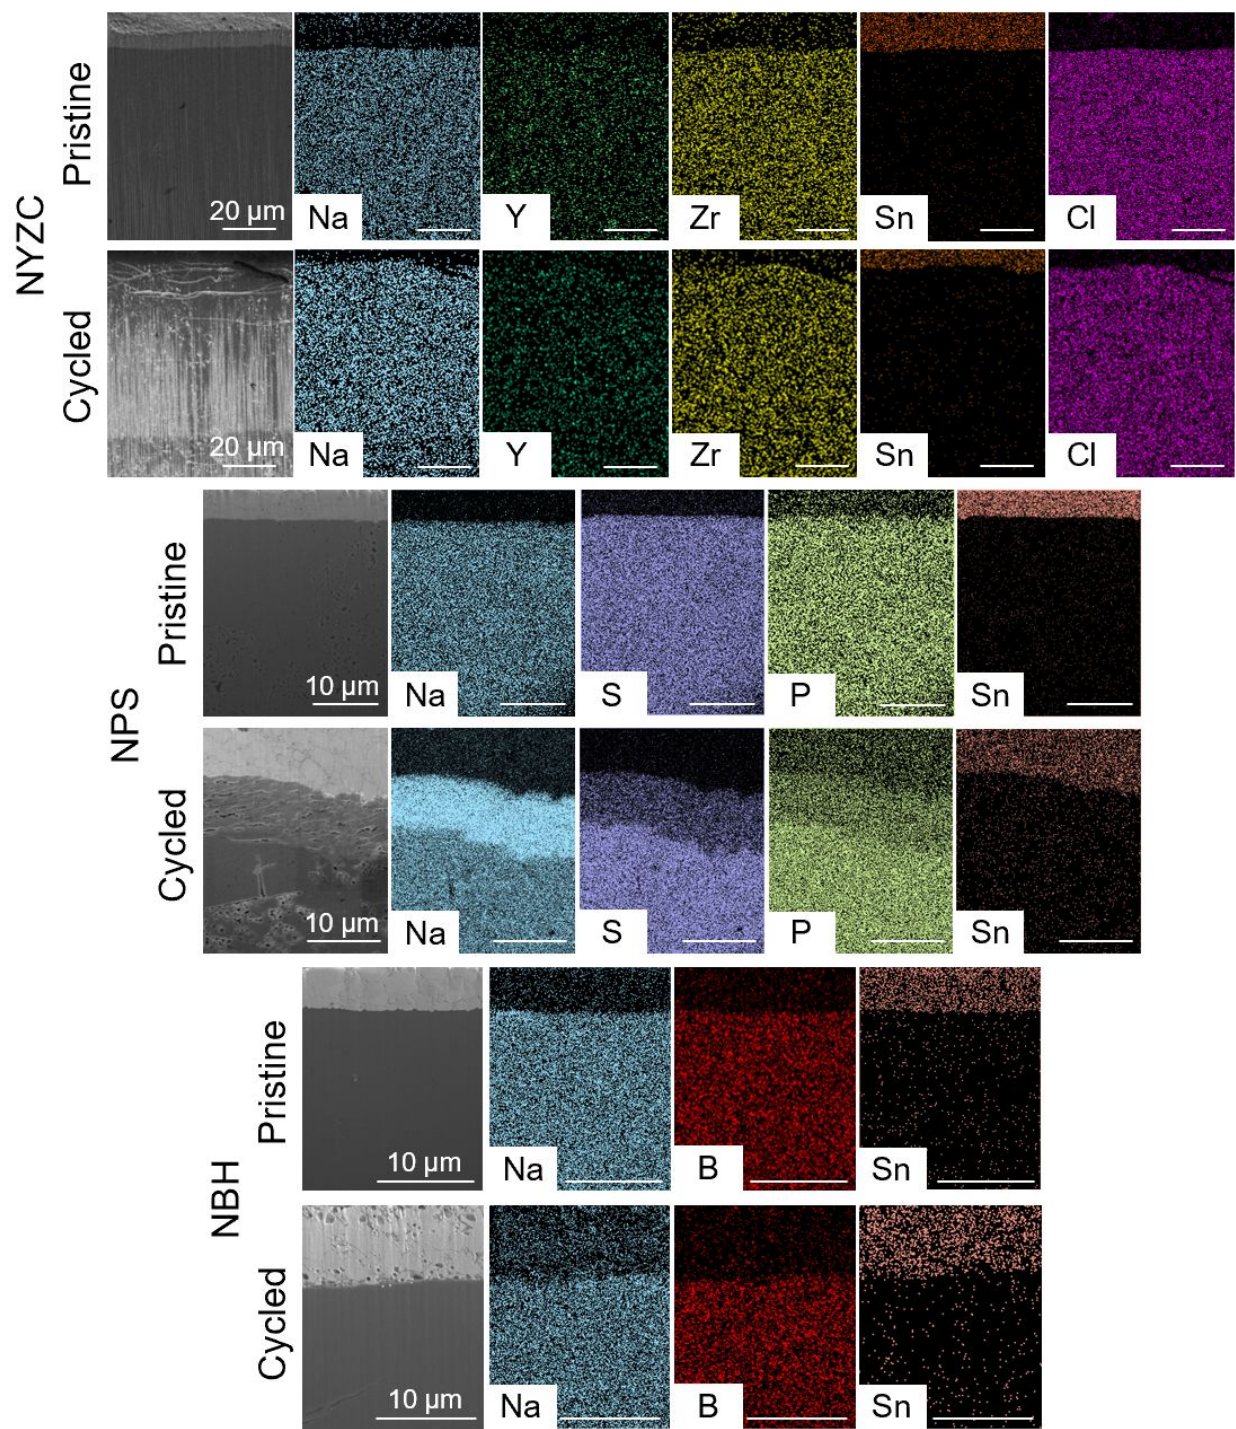

**Figure S3.** FIB-SEM with EDS mapping of Sn | SSE |  $\text{Na}_9\text{Sn}_4$  cells.

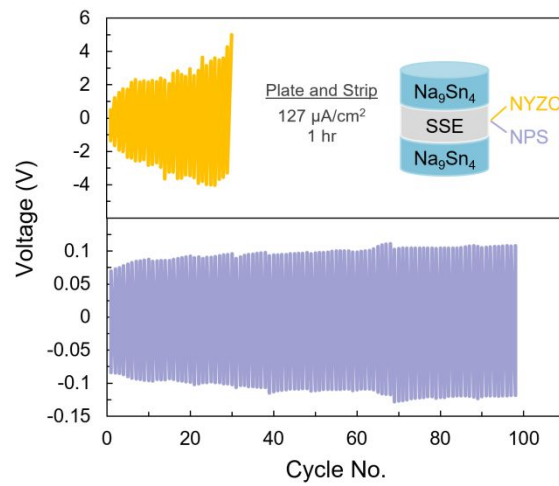

**Figure S4.** Symmetric cell evaluation using NYZC and NPS electrolytes.

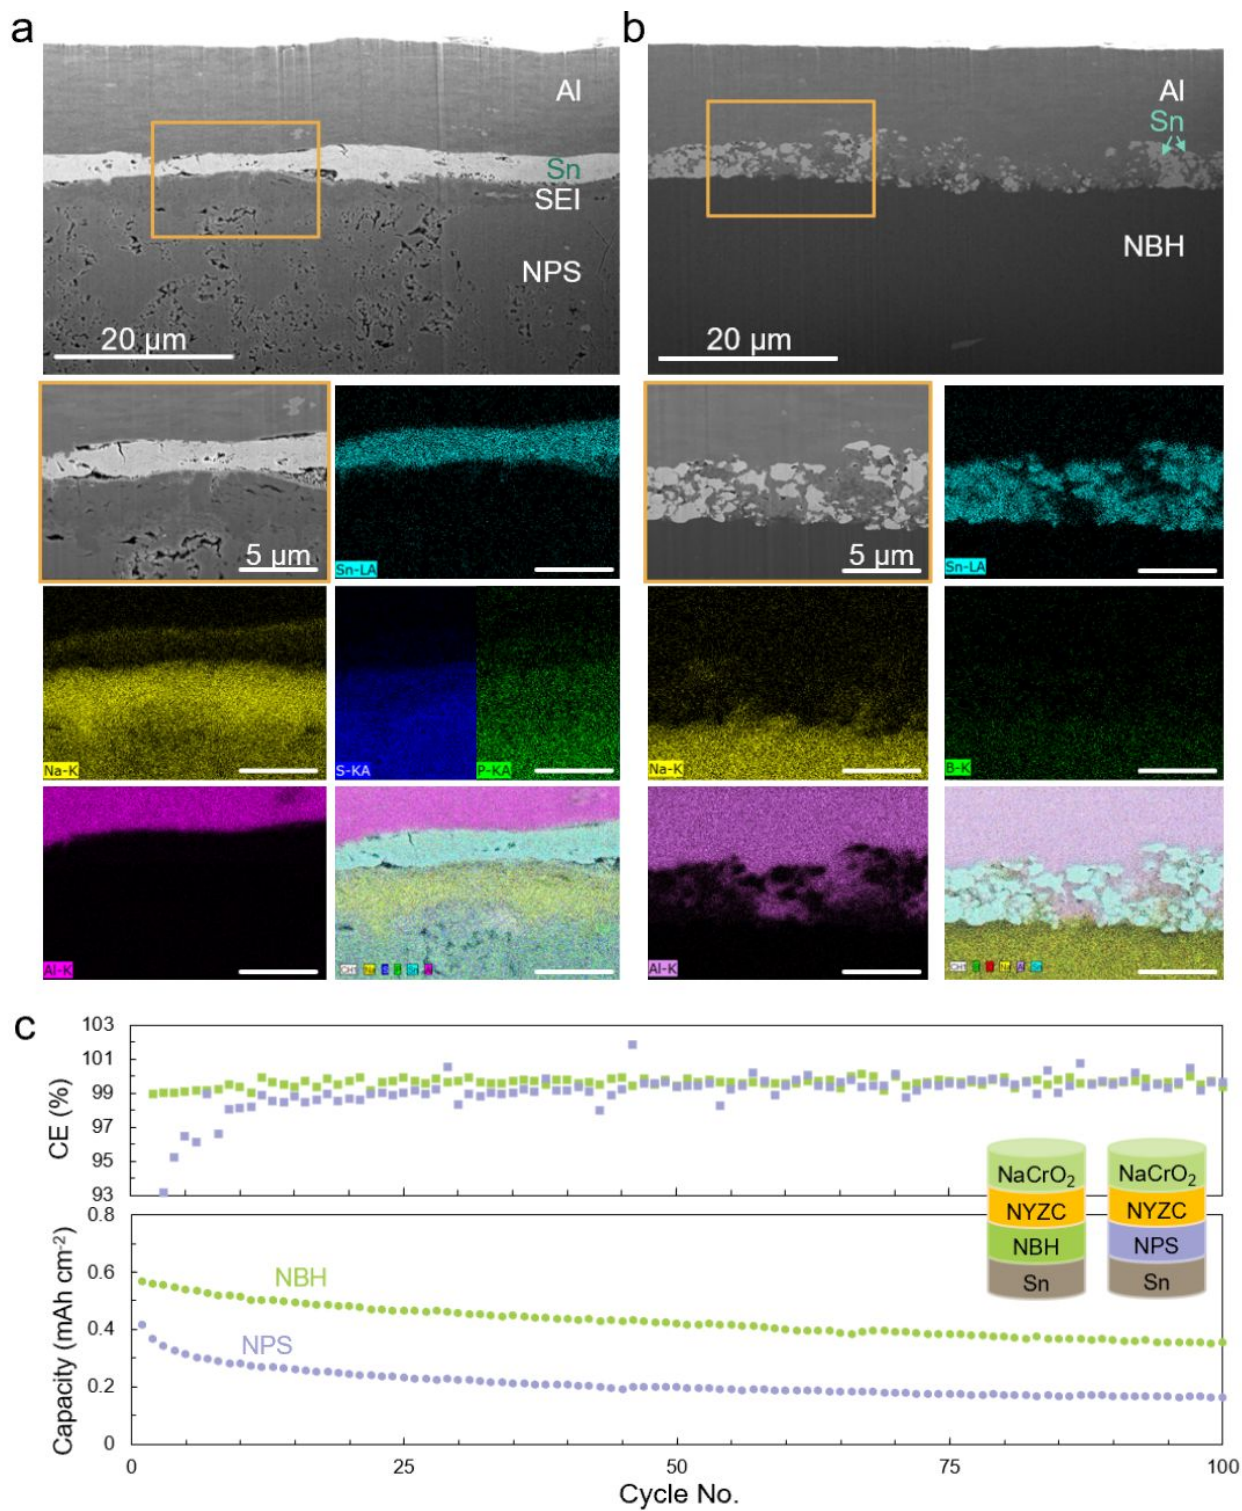

**Figure S5.** FIB-SEM anode cross-section and EDS elemental mapping for (a) Sn | NPS | NYZC | NaCrO<sub>2</sub> and (b) Sn | NBH | NYZC | NaCrO<sub>2</sub> cells after cycling. (c) Electrochemical cycling data for both cells.

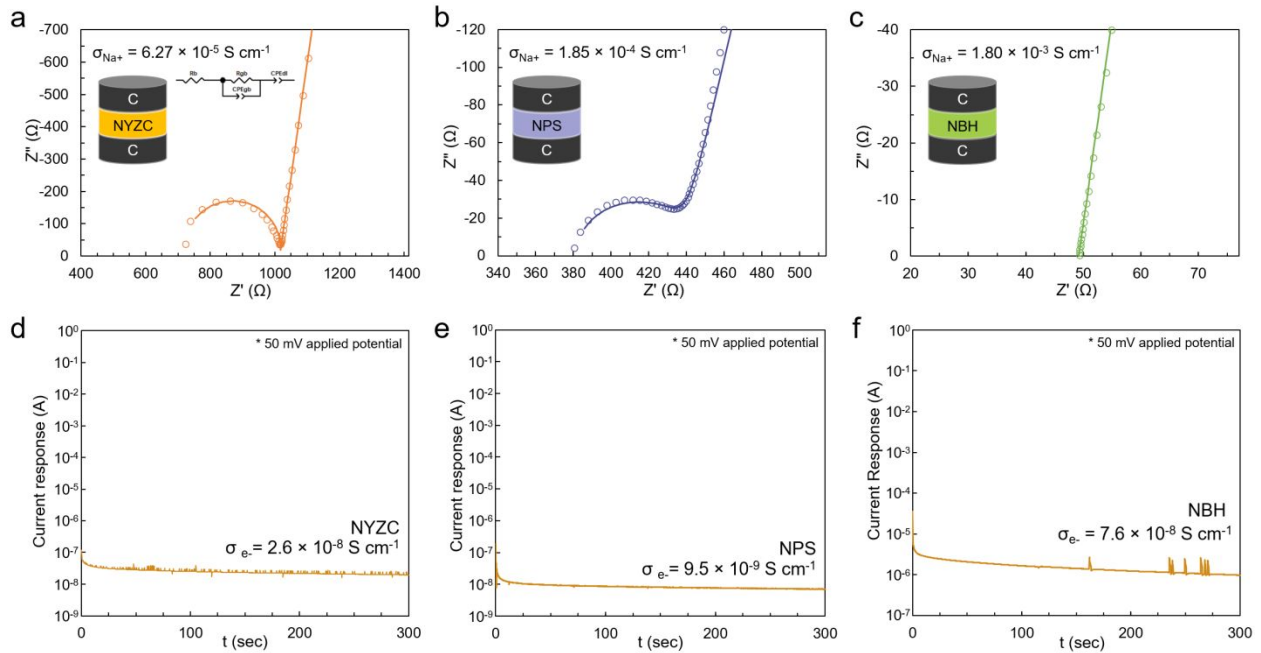

**Figure S6.** EIS measurements of (a) NYZC, (b) NPS, and (c) NBH showing  $\text{Na}^+$  conductivities of 0.0627, 0.185, and 1.8 mS/cm respectively. DC Polarization measurements of (d) NYZC, (e) NPS, and (f) NBH showing  $e^-$  conductivities of 26, 10, and 76 nS/cm respectively.

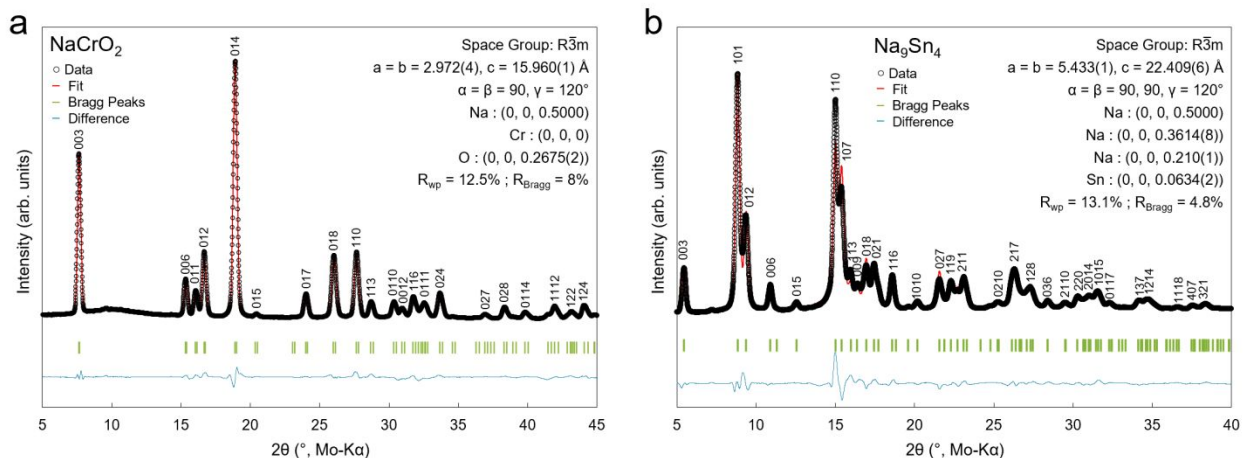

**Figure S7.** XRD refinement results of (a)  $\text{NaCrO}_2$  and (b)  $\text{Na}_9\text{Sn}_4$ .
